# Supplementary material for: Morphology optimization via pre-aggregation and miscibility matching in PM6:L8-BO ternary organic solar cells
Source: Royal Society of Chemistry journal article supplement (doi:10.1039/d4cp03206c), 2024-01-01
Supplement: d4cp03206c1.pdf [file d4cp03206c1.pdf]

## Supporting Information

*Chuyue Wei*<sup>1</sup>, *Junwei Zhang*<sup>1</sup>, *Jing Deng*<sup>1</sup>, *Xiangyan Yang*<sup>1</sup>, *Jiahui Luo*<sup>1</sup>, *Zixiao Xu*<sup>1</sup>, *Lin Zhang*<sup>3, \*</sup>,  
*Shuaishuai Yuan*<sup>2, \*</sup>, *Weihua Zhou*<sup>1, \*</sup>

<sup>1</sup> Jiangxi Province Key Laboratory of Lithium-ion Battery Materials and Application, School of Physics and Materials Science, Nanchang University, Nanchang, Jiangxi 330031, China

<sup>2</sup>Key Lab of Biobased Polymer Materials of Shandong Provincial Education Department, College of Polymer Science and Engineering, Qingdao University of Science and Technology, Qingdao 266042, China

<sup>3</sup>Hunan Key Laboratory for Super Microstructure and Ultrafast Process, School of Physics, Central, South University, Changsha 410083, China

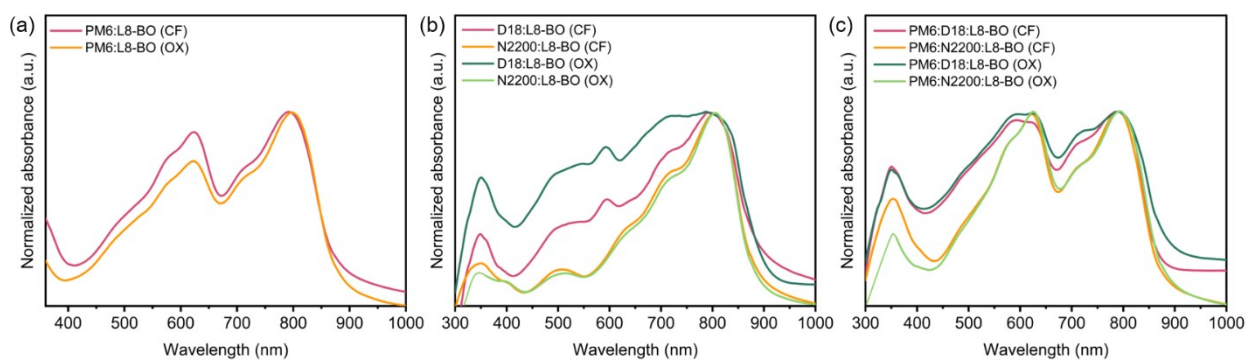

**Figure S1.** UV-vis absorption spectra of the (a) PM6:L8-BO, (b) D18:L8-BO, N2200:L8-BO, (c) PM6:D18:L8-BO, and PM6:N2200:L8-BO films casting from chloroform (CF) and o-xylene (OX).

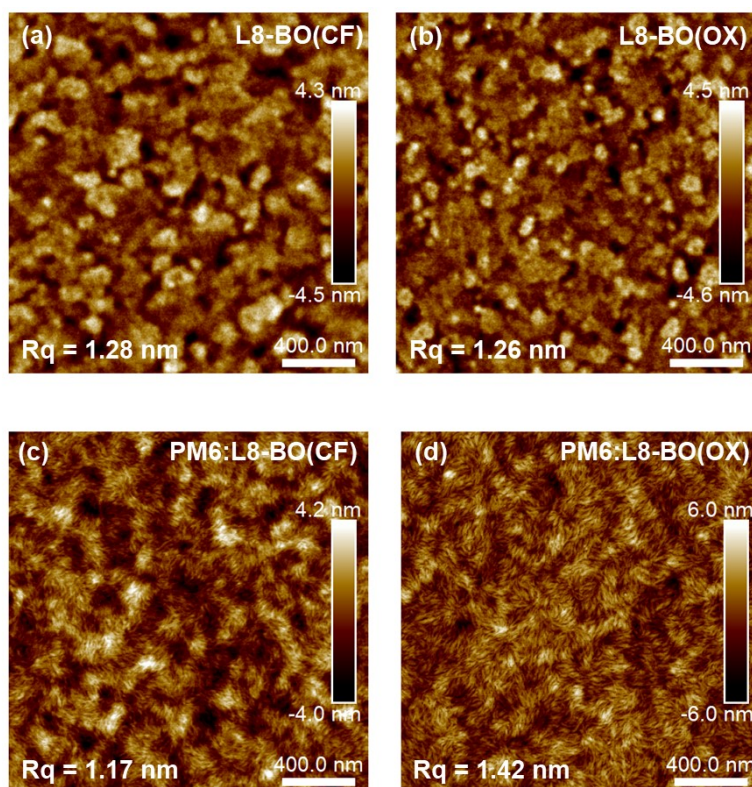

**Figure S2.** AFM images of the L8-BO and PM6:L8-BO films cast from (a), (c) chloroform (CF) and (b), (d) o-xylene (OX).

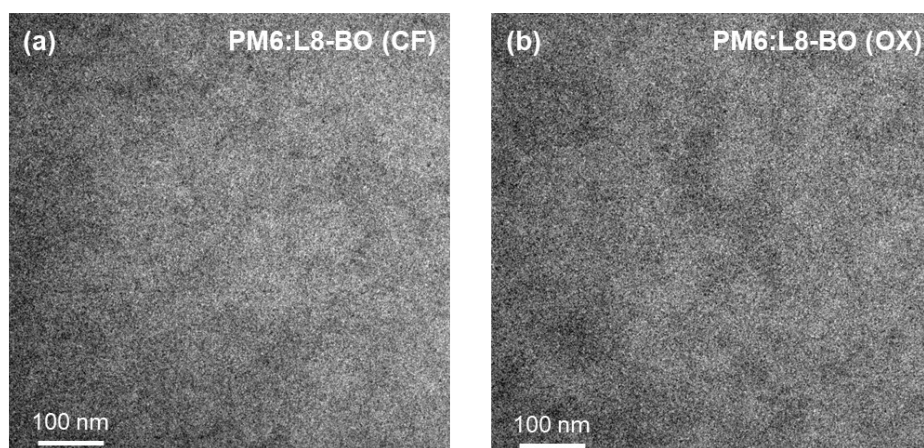

**Figure S3.** TEM images of PM6:L8-BO films cast from (a) chloroform (CF) and (b) o-xylene (OX).

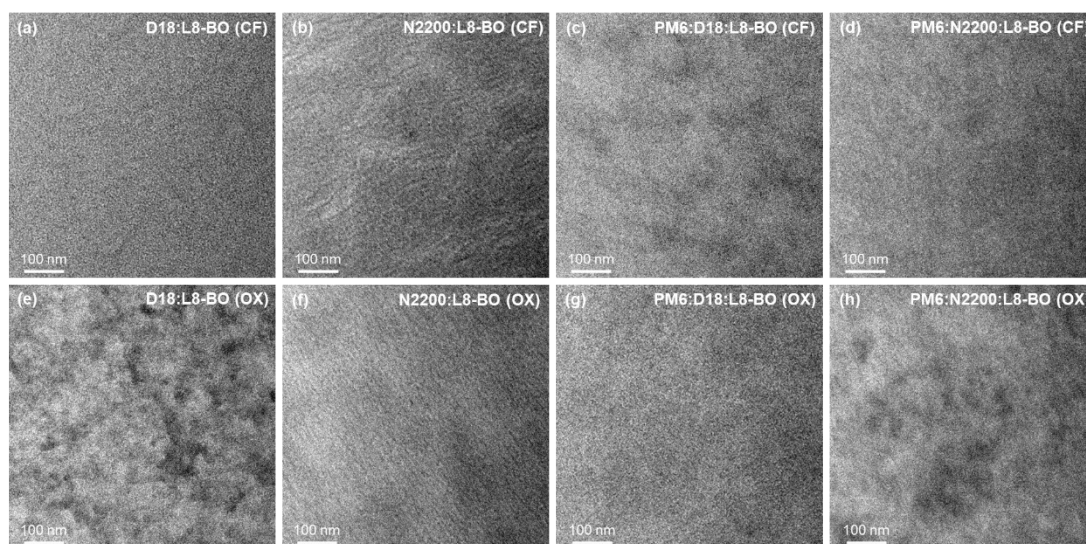

**Figure S4.** TEM images of D18:L8-BO (a, e), PM6:D18:L8-BO (c, g), N2200:L8-BO (b, f), and PM6:N2200:L8-BO (d, h) films cast from chloroform (CF) and o-xylene (OX) at elevated magnifications.

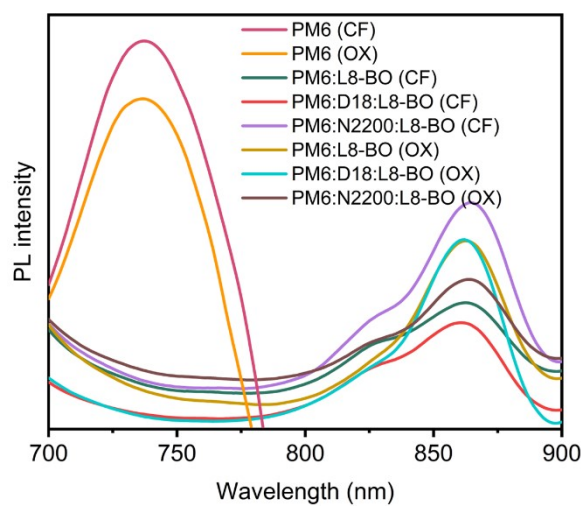

**Figure S5.** PL spectra of PM6, PM6:L8-BO, PM6:D18:L8-BO, PM6:N2200:L8-BO film cast from chloroform (CF) and o-xylene (OX).

**Table S1. Calculated films surface energy components using Wu method**

| Components |       | Interfacial surface energy            |                                       |                                     |                                        |
|------------|-------|---------------------------------------|---------------------------------------|-------------------------------------|----------------------------------------|
| 1          | 2     | $\gamma_1^d$<br>(mN·m <sup>-1</sup> ) | $\gamma_1^p$<br>(mN·m <sup>-1</sup> ) | $\gamma_1$<br>(mN·m <sup>-1</sup> ) | $\gamma_{12}$<br>(mN·m <sup>-1</sup> ) |
| <b>CF</b>  | L8-BO | 37.73                                 | 3.10                                  | 40.83                               |                                        |
| PM6        |       | 35.66                                 | 0.91                                  | 36.57                               | 1.25                                   |
| D18        |       | 34.76                                 | 0.54                                  | 35.30                               | 1.92                                   |
| N2200      |       | 32.85                                 | 0.43                                  | 33.28                               | 2.36                                   |
| <b>OX</b>  | L8-BO | 36.94                                 | 3.15                                  | 40.09                               |                                        |
| PM6        |       | 35.99                                 | 1.34                                  | 37.33                               | 0.74                                   |
| D18        |       | 36.01                                 | 0.16                                  | 36.17                               | 2.71                                   |
| N2200      |       | 30.65                                 | 0.57                                  | 31.23                               | 2.38                                   |

**Table S2. Melting point, cold crystallization temperature, and enthalpy of L8-BO, D18, N2200, D18:L8-BO, N2200:L8-BO, and PM6:L8-BO blends cast from chloroform (CF) and o-xylene (OX)**

| Solvent | Components          | T <sub>cc</sub> (°C) | ΔH <sub>cc</sub> (J/g) | T <sub>m</sub> (°C) | ΔH <sub>m</sub> (J/g) |
|---------|---------------------|----------------------|------------------------|---------------------|-----------------------|
| CF      | L8-BO               | /                    | /                      | 318.1               | -34.81                |
|         | N2200               | /                    | /                      | 326.3               | -17.07                |
|         | D18                 | /                    | /                      | /                   | /                     |
|         | PM6:L8-BO (1:1.2)   | /                    | /                      | 315.2               | -17.18                |
|         | D18:L8-BO (0.2:1.2) | /                    | /                      | 317.1               | -28.70                |
|         | N2200:L8-BO (0.2:1) | /                    | /                      | 316.3               | -34.19                |
| OX      | L8-BO               | 193.6                | 2.30                   | 315.2               | -15.13                |
|         | N2200               | /                    | /                      | 322.1               | -16.85                |
|         | D18                 | /                    | /                      | /                   | /                     |
|         | PM6:L8-BO (1:1.2)   | /                    | /                      | 297.4               | -11.99                |
|         | D18:L8-BO (0.2:1.2) | 191.4                | 0.64                   | 314.2               | -27.41                |
|         | N2200:L8-BO (0.2:1) | 200.7                | 1.51                   | 316.5               | -4.95                 |

**Table S3. The dispersive and polar components of water and diiodomethane were shown in the following table, which are quoted from the previous article (Inter. J. Adhes. Adhes. 1992, 12, 145-149).**

| Solvent                                         | $\gamma_L^d$ (mJ/m <sup>2</sup> ) | $\gamma_L^p$ (mJ/m <sup>2</sup> ) | $\gamma_L$ (mJ/m <sup>2</sup> ) |
|-------------------------------------------------|-----------------------------------|-----------------------------------|---------------------------------|
| Water (H <sub>2</sub> O)                        | 21.8                              | 51.0                              | 72.8                            |
| Diiodomethane (CH <sub>2</sub> I <sub>2</sub> ) | 50.8                              | ≈ 0                               | 50.8                            |
